# Supplementary material for: Enhancement mechanism of Sn on the catalytic performance of Cu/KIT-6 during the catalytic combustion of chlorobenzene
Source: Royal Society of Chemistry journal article supplement (doi:10.1039/c9cy01169b), 2019-01-01
Supplement: c9cy01169b1.pdf [file c9cy01169b1.pdf]

## Enhancement mechanism of Sn on the catalytic performance of Cu/KIT-6 during catalytic combustion of chlorobenzene

Fei He,<sup>\*ab</sup> Yumiao Jiao,<sup>a</sup> Liyao Wu,<sup>a</sup> Xi Chen<sup>a</sup> and Shantang Liu<sup>\*a</sup>

<sup>a</sup> Key Laboratory for Green Chemical Process of Ministry of Education, School of Chemistry and Environmental Engineering, Wuhan Institute of Technology, Wuhan 430074, PR China

<sup>b</sup> Division of Environmental Science and Engineering, Pohang University of Science and Technology (POSTECH), Pohang 37673, Korea

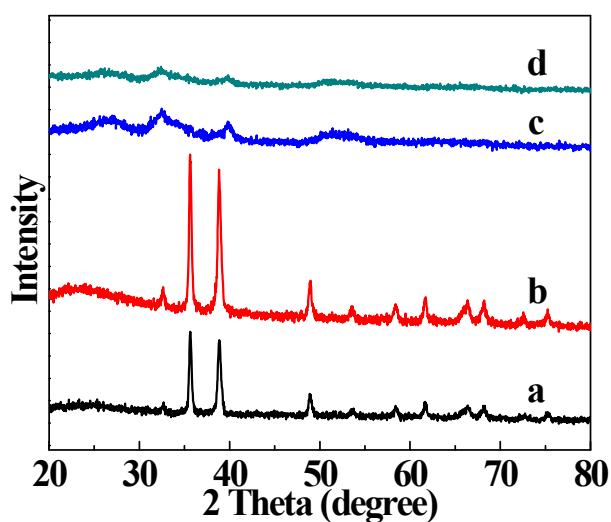

**Fig. S1** Wide-angle XRD patterns of different catalysts: (a) CK-fresh; (b) CK-used; (c) SCK0.1-fresh; (d) SCK0.1-used.

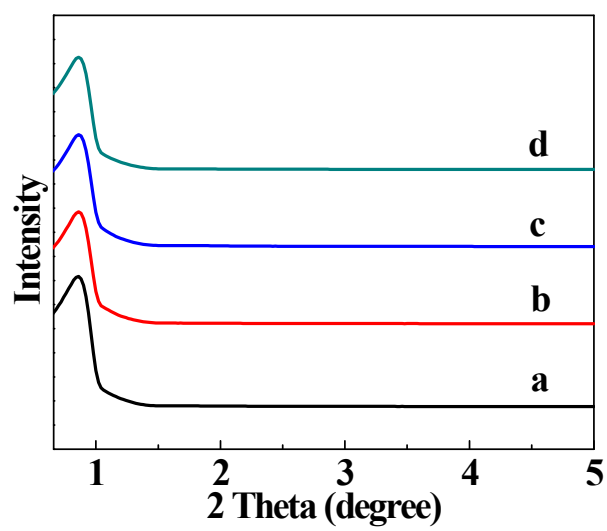

**Fig. S2** Low-angle XRD patterns of different catalysts: (a) KIT-6; (b) SCK0.05; (c) SCK0.1; (d) SCK0.2.

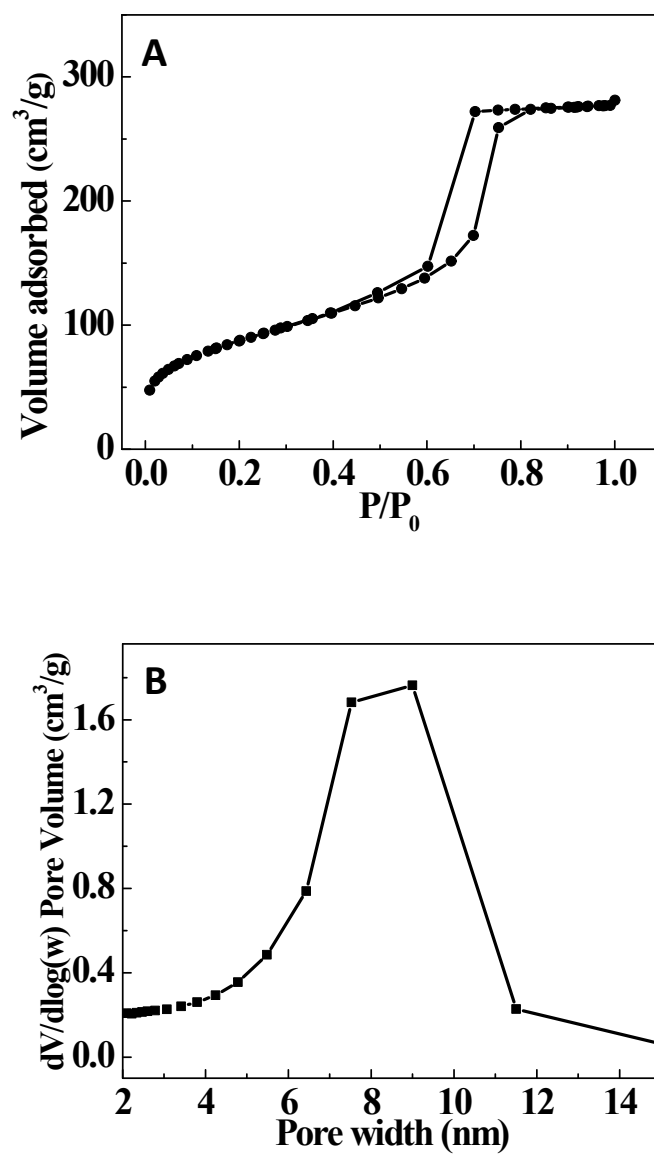

**Fig. S3** (A) Nitrogen adsorption–desorption isotherms and (B) the corresponding pore size distribution curves of the SCK0.1.

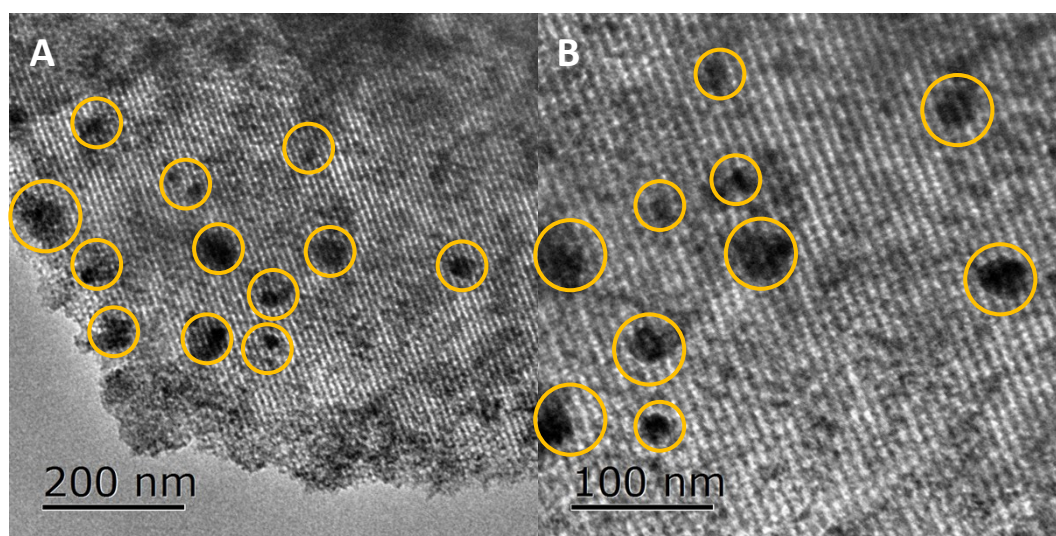

**Fig. S4** TEM images of (A) CK and (B) SCK0.1 catalysts.  
(Metal oxide nanoparticles were marked in yellow circles)

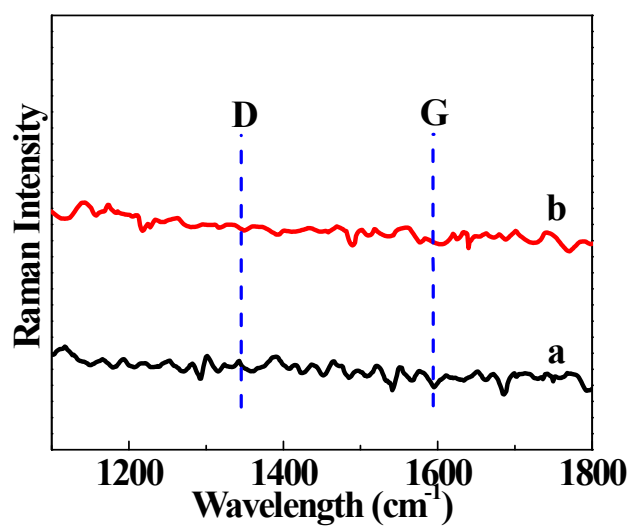

Fig. S5 Raman spectra of (a) fresh SCK0.1 and (b) used SCK0.1.

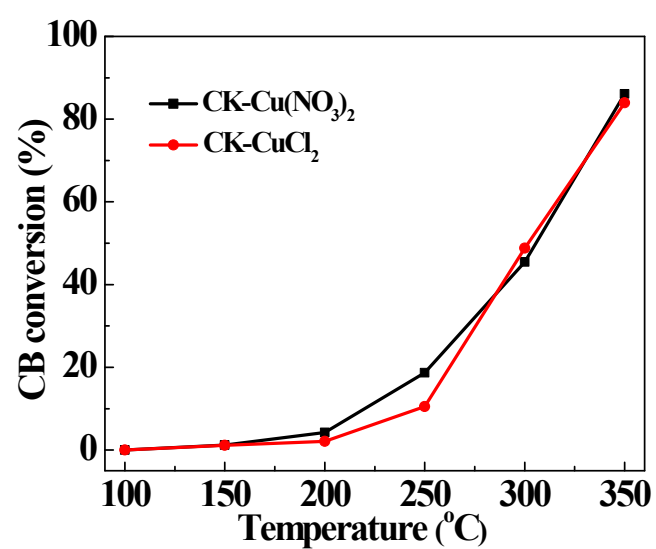

**Fig. S6** The light-off curves for CB catalytic combustion over CK catalyst prepared with  $\text{Cu}(\text{NO}_3)_2$  and  $\text{CuCl}_2$ . CB concentration: 1000 ppm; GHSV: 15000  $\text{h}^{-1}$ ; catalyst amount: 200 mg.

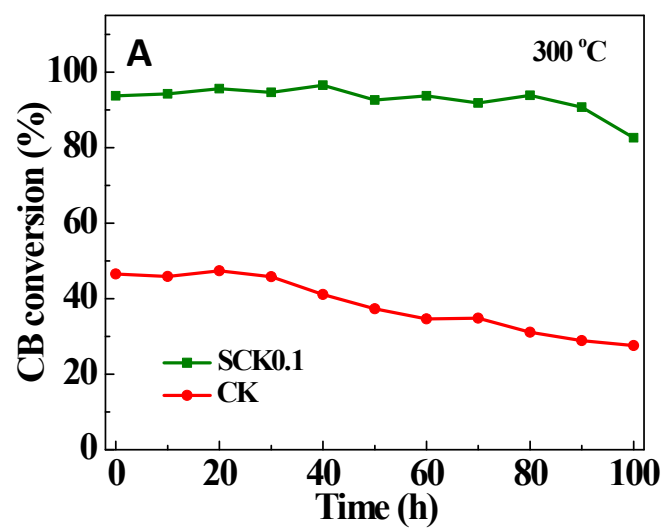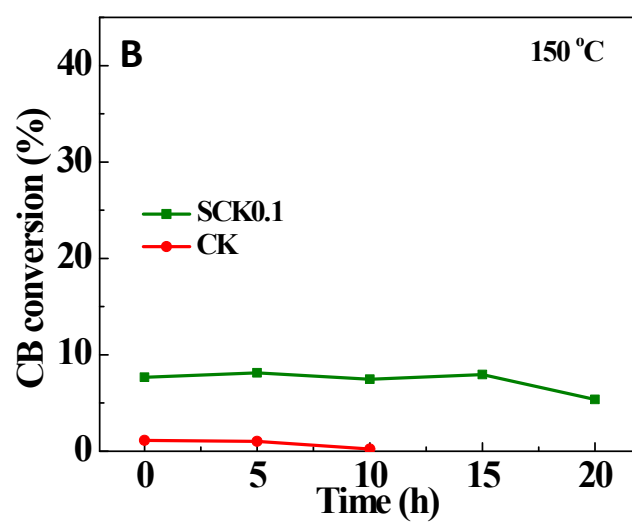

**Fig. S7** The stability of CB over SCK0.1 and CK catalysts at (A) 300 °C and (B) 150 °C. CB concentration: 1000 ppm; GHSV: 15000 h<sup>-1</sup>; catalyst amount: 200 mg.

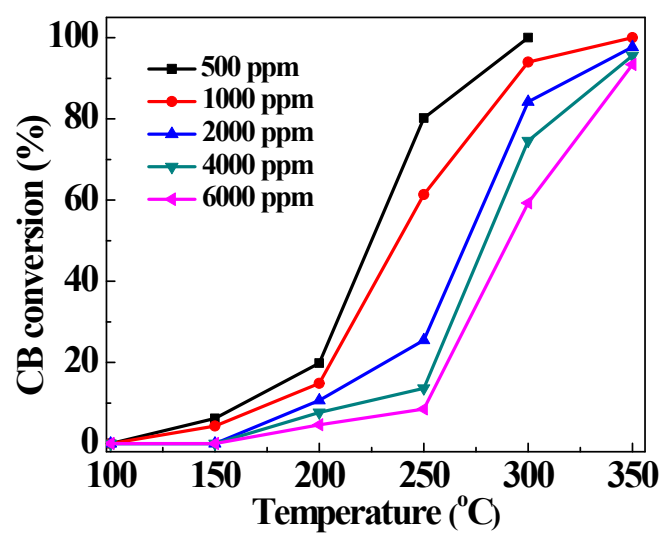

**Fig. S8** The light-off curves for CB catalytic combustion over SCK0.1 under different inlet concentration.

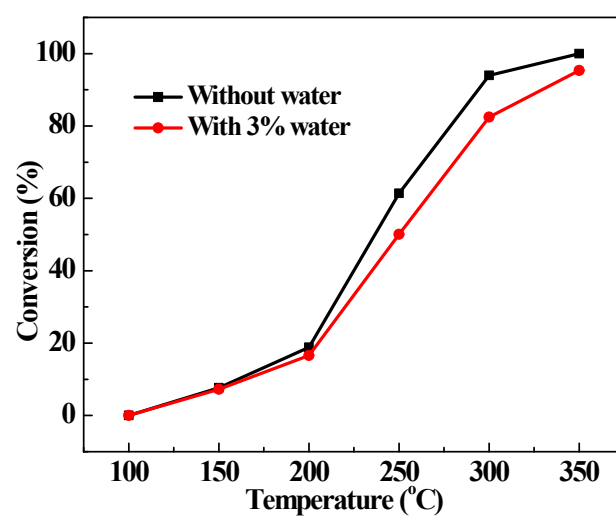

Fig. S9 Conversion of CB over SCK0.1 under dry and water (3%, v/v) air conditions. CB concentration: 1000 ppm; GHSV: 15000 h<sup>-1</sup>; catalyst amount: 200 mg.

Table S1 BET surface area, average pore size and pore volume of different catalysts.

| Sample        | BET surface area<br>(m <sup>2</sup> · g <sup>-1</sup> ) | Average pore size<br>(nm) | Pore volume<br>(cm <sup>3</sup> · g <sup>-1</sup> ) |
|---------------|---------------------------------------------------------|---------------------------|-----------------------------------------------------|
| KIT-6         | 612                                                     | 5.64                      | 0.85                                                |
| CK            | 388                                                     | 5.18                      | 0.59                                                |
| SK            | 389                                                     | 5.6                       | 0.46                                                |
| SCK0.05-fresh | 356                                                     | 5.33                      | 0.55                                                |
| SCK0.1-fresh  | 317                                                     | 5.16                      | 0.44                                                |
| SCK0.15-fresh | 311                                                     | 4.81                      | 0.42                                                |
| SCK0.2-fresh  | 304                                                     | 4.43                      | 0.4                                                 |
| CK-used       | 377                                                     | 5.54                      | 0.52                                                |
| SCK0.1-used   | 294                                                     | 5.14                      | 0.42                                                |

Table S2 Physicochemical properties of various catalysts.

| Catalysts    | Cu <sup>a</sup> (%) |                 | Sn <sup>b</sup> (%) |                  | Sn/Cu <sup>c</sup> | O <sub>ads</sub> /(O <sub>latt</sub> + O <sub>ads</sub> + O <sub>wat</sub> ) <sup>d</sup> (%) | Cl <sup>e</sup> (%) |
|--------------|---------------------|-----------------|---------------------|------------------|--------------------|-----------------------------------------------------------------------------------------------|---------------------|
|              | Cu <sup>2+</sup>    | Cu <sup>+</sup> | Sn <sup>4+</sup>    | Sn <sup>2+</sup> |                    |                                                                                               |                     |
| CK fresh     | 53.4                | 46.6            | /                   | /                | /                  | 47.8                                                                                          | /                   |
| CK used      | 40.8                | 59.2            | /                   | /                | /                  | 45.4                                                                                          | 0.96                |
| SCK0.1 fresh | 62.9                | 37.1            | 97.9                | 2.1              | 0.23               | 49.6                                                                                          | 3.27                |
| SCK0.1 used  | 60.2                | 49.8            | 91.7                | 8.3              | 0.37               | 46.8                                                                                          | 3.33                |

<sup>a</sup> Obtained from the deconvolution results of Auger L3VV kinetic energy spectra of samples.

<sup>b</sup> Obtained from the deconvolution results of XPS spectra of samples.

<sup>c</sup> The surface Sn/Cu molar ratio estimated by XPS analysis.

<sup>d</sup> Percentage of the surface oxygen species,  $O_{ads} = O_{ads}/(O_{ads} + O_{latt} + O_{wat}) \times 100\%$ .

<sup>e</sup> Surface Cl content obtained from the deconvolution results of XPS spectra.

Table S3 Catalytic activity of different catalysts for CB combustion.

| Catalyst | T10 (°C) | T50 (°C) | T90 (°C) |
|----------|----------|----------|----------|
| CK       | 238      | 306      | /        |
| SK       | 306      | /        | /        |
| SCK0.05  | 198      | 264      | 298      |
| SCK0.1   | 161      | 237      | 294      |
| SCK0.15  | 207      | 267      | 321      |
| SCK0.2   | 212      | 272      | 335      |

Table S4 Amounts of the surface Cu<sup>2+</sup> cations and performance of the catalysts.

| Catalysts | r <sup>a</sup> ( $\times 10^{-3}$ $\mu\text{mol} \cdot \text{m}^{-2} \cdot \text{min}^{-1}$ ) | E <sub>a</sub> <sup>b</sup> (KJ/mol) |
|-----------|-----------------------------------------------------------------------------------------------|--------------------------------------|
| CK        | 2.4                                                                                           | 58.20                                |
| SCK0.05   | 6.3                                                                                           | 42.40                                |
| SCK0.1    | 13.2                                                                                          | 35.42                                |
| SCK0.15   | 4.4                                                                                           | 44.23                                |
| SCK0.2    | 3.1                                                                                           | 56.87                                |
| SK        | 0.5                                                                                           | 61.27                                |

<sup>a</sup> The r (reaction rate) calculated based on the mole of CB transformed per minute and per square meter from CB conversion at 200 °C under the reaction condition described in Fig. 4A.

<sup>b</sup> E<sub>a</sub> calculated based on the result showed in Fig. 4B.
